# Supplementary material for: Design of packaging style recommendation system based on user behavior analysis and emotional feature extraction
Source: PeerJ journal article supplement (doi:10.7717/peerj-cs.3302), 2026-02-02
Supplement: readme.docx [file readme.docx]

**🎁 Packaging Style Recommendation System Based on User Behavior and Emotional Feature Extraction**

**📝 Overview**

This project implements an **intelligent recommendation system** that analyzes **user behavior** and **emotional features** from review comments to recommend personalized **packaging styles**. It leverages advanced deep learning techniques including **BERT**, **BiRNN**, **CNN**, and **attention mechanisms**, culminating in a novel model called **HAER-UBSA** (Hierarchical Attention Enhanced Recommendation - User Behavior and Sentiment Analysis).

**📌 Features**

- 📊 User behavior modeling from interaction data
- 🧠 Emotional feature extraction from review text using **BERT + BiRNN**
- 🕸️ Deep feature extraction with **CNN + Self-Attention**
- 🔄 Fusion of shallow and deep features for rating prediction
- 🎯 Hierarchical Attention mechanism to model user-item relationships
- 📈 Achieved **10.34% improvement in MAE** and **10.00% in RMSE** over baselines

**📂 Project Structure**

├── data/ # Raw and preprocessed datasets

│ ├── user_behavior.csv

│ ├── reviews.csv

│ └── items.csv

├── models/ # Model architecture files

│ ├── bert_birnn.py

│ ├── cnn_attention.py

│ └── haer_ubsa.py

├── utils/ # Preprocessing and utility functions

│ ├── preprocess.py

│ ├── metrics.py

│ └── train_test_split.py

├── train.py # Training pipeline

├── evaluate.py # Model evaluation script

├── requirements.txt # List of dependencies

└── README.md # You're here!

**🚀 How to Run the Code**

**1. 🔧 Environment Setup**

It is recommended to use a virtual environment or conda.

python -m venv venv

source venv/bin/activate # On Windows: venv\Scripts\activate

**2. 📦 Install Dependencies**

pip install -r requirements.txt

**3. 📁 Prepare Data**

Place your datasets (user_behavior.csv, reviews.csv, items.csv) in the data/ directory. Ensure the format follows:

- user_behavior.csv: contains user IDs and interaction logs.
- reviews.csv: contains user reviews with sentiment-rich text.
- items.csv: contains packaging item details and IDs.

You may use utils/preprocess.py to clean and preprocess the raw data.

python utils/preprocess.py

**4. 🏋️‍♂️ Train the Model**

python train.py --model haer_ubsa --epochs 10 --batch_size 32

Optional arguments:

- --lr: learning rate (default: 1e-4)
- --save_model: path to save model checkpoint

**5. 📊 Evaluate the Model**

python evaluate.py --model_checkpoint saved_model.pth

This will compute **MAE**, **RMSE**, and other metrics on the test set.

**🧠 Model Architecture Summary**

- **Input**: User behavior logs and comment text
- **Text Encoding**: BERT + BiRNN for emotional sentiment features
- **Deep Feature Extraction**: CNN + Self-Attention
- **Fusion Layer**: MLP combining shallow and deep features
- **Output**: Predicted user rating for packaging style

**📈 Experimental Results**

| **Model** | **MAE** | **RMSE** |
| --- | --- | --- |
| Baseline A | 0.642 | 0.811 |
| Baseline B | 0.628 | 0.793 |
| **HAER-UBSA** | **0.575** | **0.713** |

**Improvement**:

- MAE: +10.34%
- RMSE: +10.00%

**📌 Citation**

If you use this code or model in your research, please cite:

*Design of Packaging Style Recommendation System Based on User Behavior Analysis and Emotional Feature Extraction*, 2025.
